# Supplementary material for: Synthesis of N-methylol polyamide 4: characterization, properties, and biodegradability
Source: Royal Society of Chemistry journal article supplement (doi:10.1039/d3ma00047h), 2023-12-05
Supplement: d3ma00047h1.pdf [file d3ma00047h1.pdf]

## Supporting information

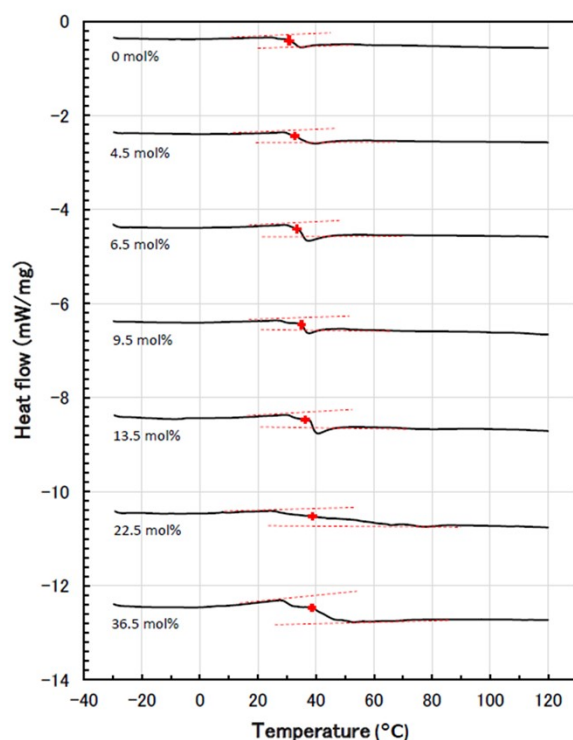

Figure S1. DSC thermograms for glass transition of polyamide 4 and *N*-methylol polyamide 4 with different degree of methylation.

Table S1 Glass transition point of several vinyl polymers <sup>a</sup>.

|                         |                                                            |             |
|-------------------------|------------------------------------------------------------|-------------|
| Poly(ethylene)          | -125°C, -118°C, -110°C, -83°C, -78°C, -25°C, 2°C           | av. -76.7°C |
| Poly(propylene) atactic | -35°C, -30°C, -20°C, -10°C, -7°C, -6°C                     | av. -18.0°C |
| Poly(vinyl acetate)     | 29°C, 30°C, 31°C, 32°C, 38°C, 40°C, 42°C                   | av. 34.6°C  |
| Poly(vinyl alcohol)     | 35°C, 77°C, 85°C                                           | av. 65.7°C  |
| Poly(vinyl chloride)    | 69°C, 74°C, 80°C, 81°C, 84°C, 86°C, 88°C, 90°C, 93°C, 98°C | av. 84.3°C  |
| Poly(acrylic acid)      | 75°C, 106°C                                                | av. 90.5°C  |

<sup>a</sup> Reported data from Polymer Handbook 4th ed., 1999, Section VI, 193.

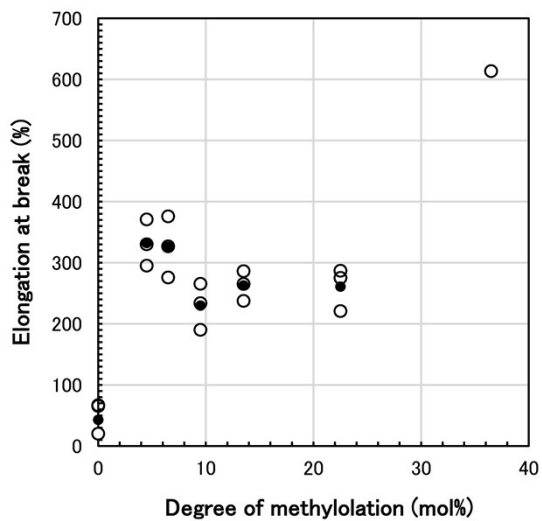

Figure S2. Relationship between elongation at break and degree of methylation for *N*-methylol polyamide 4 (black filled circle: average of each lot, white open circle: average of each specimen for same lot).

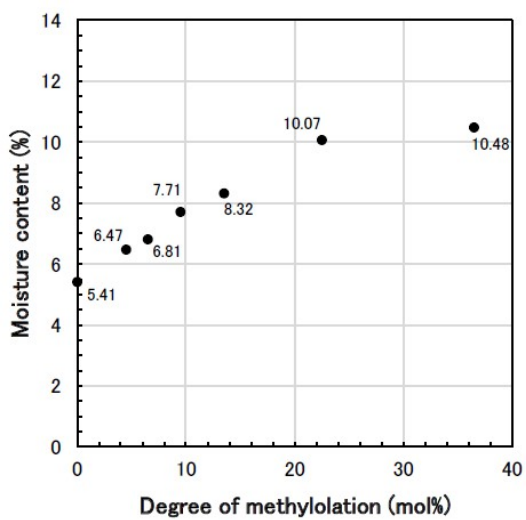

Figure S3. Relationship between moisture content and degree of methylation at hygroscopic equilibrium.
